# Supplementary material
Source: PubMed Central journal article supplement (PMC5955761)
Supplement: NIHMS896350-supplement-supplement2.pdf [file NIHMS896350-supplement-supplement2.pdf]

Supplemental Table 7

*Latent Variable Means for Each Latent Class in the Three-Class Models*

| Class                  | <i>Females</i> |        |           |                   |                   | <i>Males</i>      |        |                   |                   |                   |
|------------------------|----------------|--------|-----------|-------------------|-------------------|-------------------|--------|-------------------|-------------------|-------------------|
|                        | Intercept      | Slope  | Common EF | Updating-Specific | Shifting-Specific | Intercept         | Slope  | Common EF         | Updating-Specific | Shifting-Specific |
| <b>Teacher Ratings</b> |                |        |           |                   |                   |                   |        |                   |                   |                   |
| Internalizing          |                |        |           |                   |                   |                   |        |                   |                   |                   |
| Class 1                | 3.23*          | -1.31  | -0.58     | -0.03             | 0.22              | 3.65*             | -0.50  | -1.41*            | -0.65             | -0.07             |
| Class 2                | 1.22*          | -0.08  | -0.38     | -0.19             | -0.33             | 1.58*             | -0.92* | -0.28             | -0.14             | -0.31             |
| Class 3                | -0.12          | -0.54  | 0.03      | -0.22             | -0.24             | 0.00 <sup>a</sup> | -0.55  | 0.00 <sup>a</sup> | 0.00 <sup>a</sup> | 0.00 <sup>a</sup> |
| Externalizing          |                |        |           |                   |                   |                   |        |                   |                   |                   |
| Class 1                | 3.57*          | -1.86* | -0.59     | 0.48              | 0.29              | 4.31*             | -0.60  | -1.22*            | 0.56              | 0.37              |
| Class 2                | -0.43          | -0.51  | -0.47*    | -0.06             | -0.14             | 2.49*             | -1.37* | -0.73*            | 0.05              | -0.02             |
| Class 3                | 1.53*          | -0.44  | -0.51     | 0.22              | 0.17              | 0.00 <sup>a</sup> | -0.29  | 0.00 <sup>a</sup> | 0.00 <sup>a</sup> | 0.00 <sup>a</sup> |
| <b>Parent Ratings</b>  |                |        |           |                   |                   |                   |        |                   |                   |                   |
| Internalizing          |                |        |           |                   |                   |                   |        |                   |                   |                   |
| Class 1                | 2.23*          | 0.21   | -0.08     | 0.13              | 0.03              | 2.01*             | -0.09  | -0.05             | 0.10              | -0.04             |
| Class 2                | 4.95*          | 0.55   | -0.05     | -0.28             | -0.01             | 4.99*             | -0.13  | -0.45             | 0.05              | 0.32              |
| Class 3                | 0.60           | -1.13* | -0.04     | 0.07              | 0.00              | 0.00 <sup>a</sup> | -0.55  | 0.00 <sup>a</sup> | 0.00 <sup>a</sup> | 0.00 <sup>a</sup> |
| Externalizing          |                |        |           |                   |                   |                   |        |                   |                   |                   |
| Class 1                | 3.69*          | -0.19  | -0.24     | 0.06              | 0.33              | 4.17*             | -0.16  | -0.45             | -0.13             | 0.42              |
| Class 2                | 1.29*          | -1.12* | -0.05     | 0.16              | 0.09              | 2.38*             | -1.32* | 0.03              | 0.28              | 0.04              |
| Class 3                | -1.13*         | -1.70* | 0.04      | -0.05             | -0.07             | 0.00 <sup>a</sup> | -2.06* | 0.00 <sup>a</sup> | 0.00 <sup>a</sup> | 0.00 <sup>a</sup> |

*Note.* Estimates taken from 3-class models (with sex as a known class) in which the Common Executive Function (EF), Updating-Specific, and Shifting-Specific latent factors were included as distal outcomes. The EF model was strictly invariant across classes and EF factors had variances of 1.0. Thus, only the EF latent means were allowed to differ across class and sex (in addition to the growth factor means). To account for sex differences in some EF tasks that did not translate to latent EF differences (i.e., sex differences in the EF task intercepts), each EF task was regressed on sex and the resulting residuals were used to estimate these models.

<sup>a</sup>By default, the latent EF means for the last group (Class 3 for males) are constrained to zero, so all other means represent the difference from that class in standard deviation units. Also, the latent Intercept mean in the last class is also constrained to zero as a reference, so all other Intercept means represent the unstandardized difference from that class. \* $p < .05$ .
