# Supplementary material
Source: PubMed Central journal article supplement (PMC5955761)
Supplement: NIHMS896350-supplement-supplement3.pdf [file NIHMS896350-supplement-supplement3.pdf]

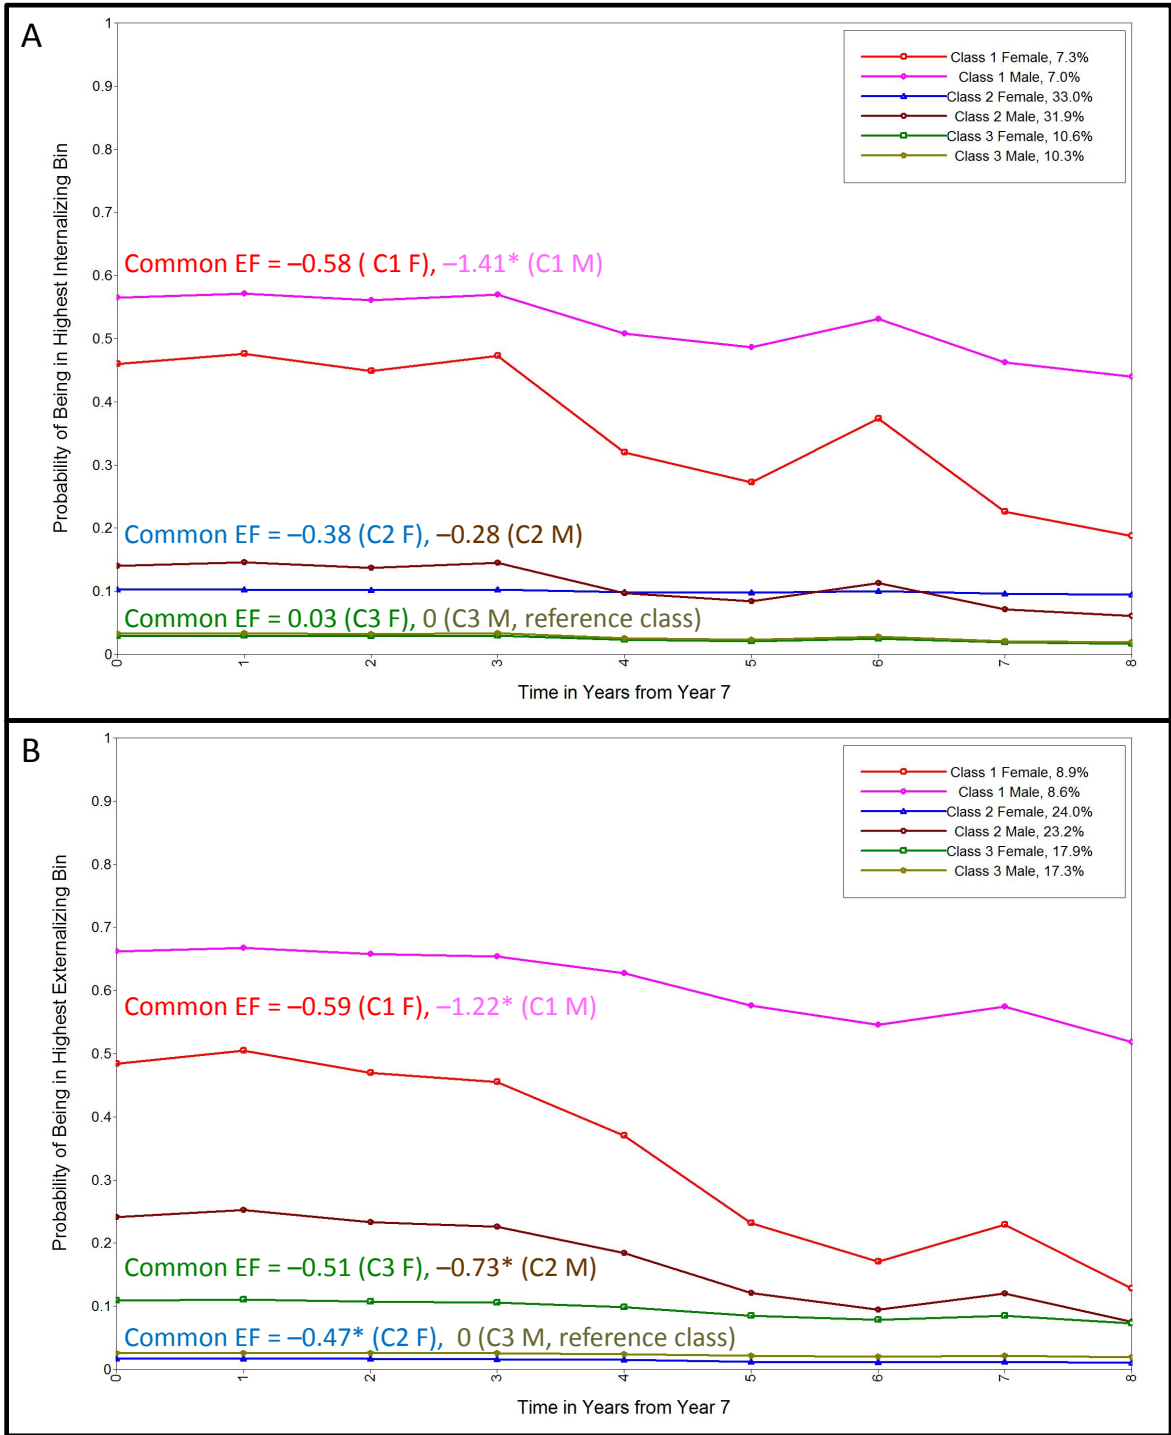

Supplemental Figure 1. Trajectories of teacher-rated internalizing (panel A) and externalizing (panel B) problems from the 3-class solutions with sex as a known class. For each class and sex, the trajectory depicts the probability of individuals in that class exhibiting the highest level of problems (i.e., bin 4; a score > 10). Solutions were taken from the model with the latent EF factors as distal outcomes, and Common EF means are noted for each class in corresponding colors (female first). \* $p < .05$ .

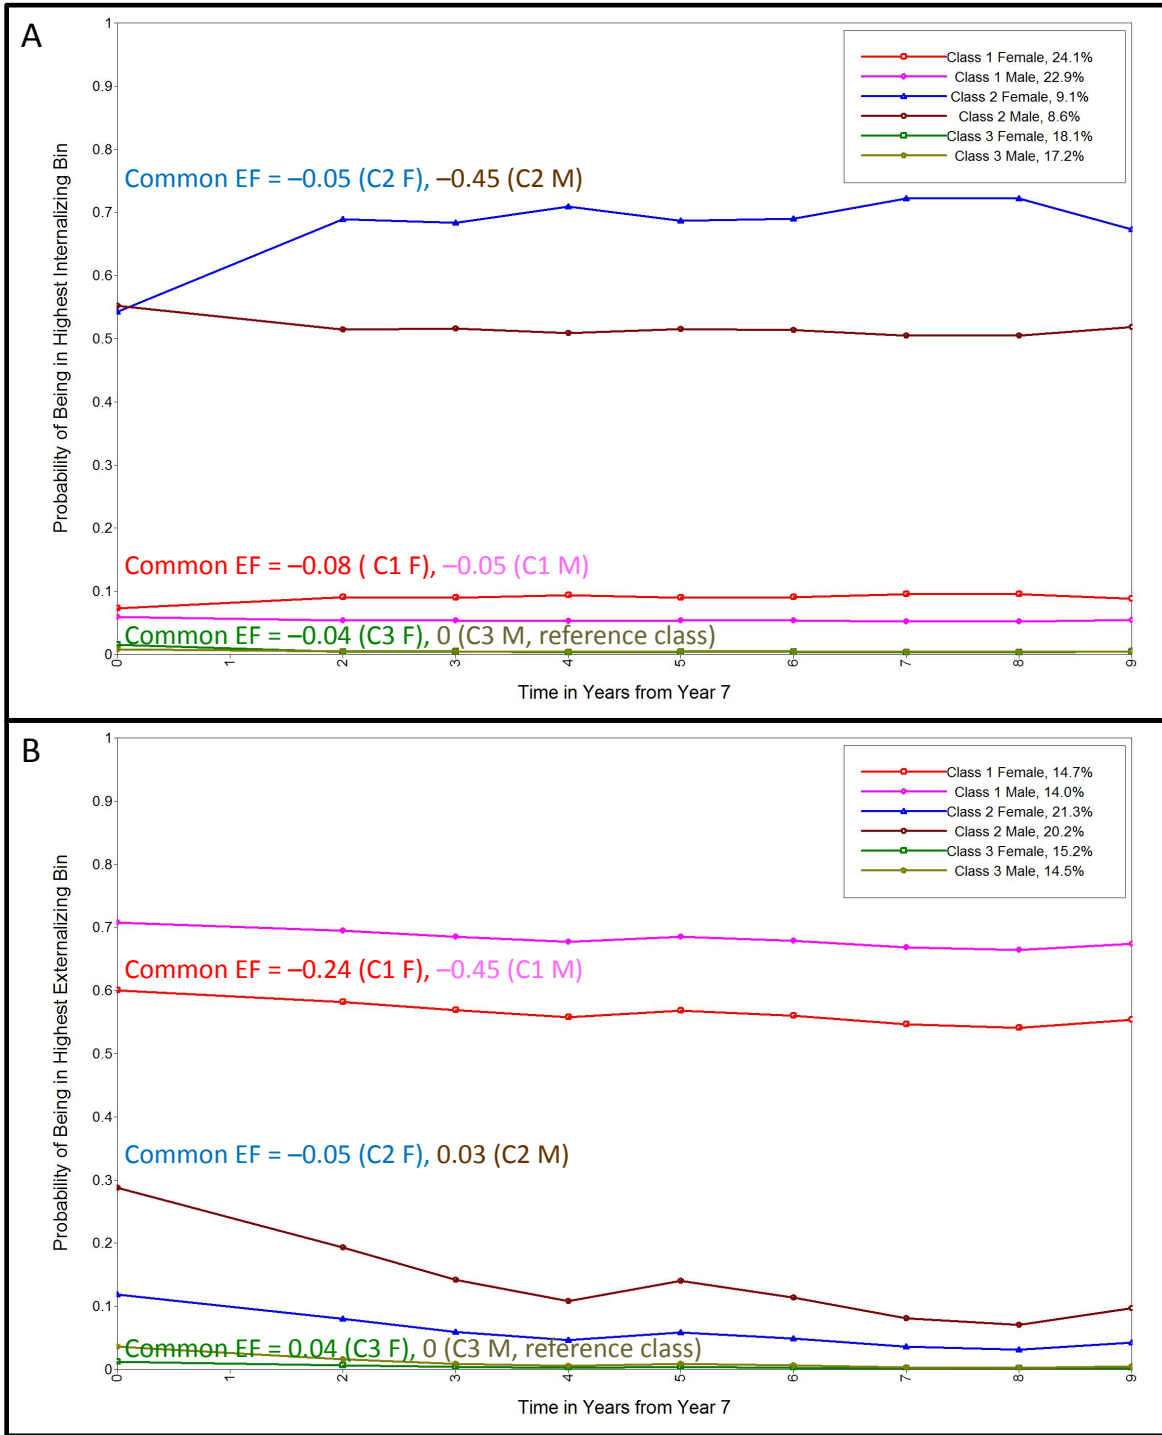

Supplemental Figure 2. Trajectories of parent-rated internalizing (panel A) and externalizing (panel B) problems from the 3-class solutions with sex as a known class. For each class and sex, the trajectory depicts the probability of individuals in that class exhibiting the highest level of problems (i.e., bin 4; a score > 10). Solutions were taken from the model with the latent EF factors as distal outcomes, and Common EF means are noted for each class in corresponding colors (female first). \* $p < .05$ .
